# Supplementary material for: Estrogen Receptor Beta Influences the Inflammatory p65 Cistrome in Colon Cancer Cells
Source: Front Endocrinol (Lausanne). 2021 Mar 30;12:650625. doi: 10.3389/fendo.2021.650625 (PMC8042384; doi:10.3389/fendo.2021.650625)
Supplement: Supplementary Table 2 — p65 promoter binding sites in colon cancer cells. [file Table_2.xlsx]

## Sheet: Sheet1
Chr	Start	End	Strand	Peak Score	Distance to TSS	Nearest PromoterID	Entrez ID	Nearest Unigene	Nearest Refseq	Nearest Ensembl	Gene Name	Gene Alias	Gene Description	Gene Type
chr6	137867113	137867324	+	68.2	30	NM_001270507	7128	Hs.211600	NM_006290	ENSG00000118503	TNFAIP3	A20|AISBL|OTUD7C|TNFA1P2	TNF alpha induced protein 3	protein-coding
chr11	72814170	72814386	+	51.7667	-128	NM_033388	89849	Hs.653186	NM_033388	ENSG00000168010	ATG16L2	ATG16B|WDR80	autophagy related 16 like 2	protein-coding
chr10	102394371	102394593	+	50.35	-96	NM_001077494	4791	Hs.73090	NM_002502	ENSG00000077150	NFKB2	CVID10|H2TF1|LYT-10|LYT10|NF-kB2|p100|p49/p100|p52	nuclear factor kappa B subunit 2	protein-coding
chr11	102317206	102317444	+	48.3167	-125	NM_182962	330	Hs.127799	NM_001165	ENSG00000023445	BIRC3	AIP1|API2|CIAP2|HAIP1|HIAP1|MALT2|MIHC|RNF49|c-IAP2	baculoviral IAP repeat containing 3	protein-coding
chr2	99181014	99181222	+	42.35	39	NM_145212	51263	Hs.346736	NM_016503	ENSG00000185414	MRPL30	L28MT|L30MT|MRP-L28|MRP-L30|MRPL28|MRPL28M|RPML28	mitochondrial ribosomal protein L30	protein-coding
chr5	151080977	151081179	+	41.6833	6	NM_001252385	10318	Hs.355141	NM_006058	ENSG00000145901	TNIP1	ABIN-1|NAF1|VAN|nip40-1	TNFAIP3 interacting protein 1	protein-coding
chr19	38899846	38900048	+	39.8167	17	NM_002503	4793	Hs.9731	NM_002503	ENSG00000104825	NFKBIB	IKBB|TRIP9	NFKB inhibitor beta	protein-coding
chr20	45348406	45348611	+	37.35	-84	NM_002999	6385	Hs.632267	NM_002999	ENSG00000124145	SDC4	SYND4	syndecan 4	protein-coding
chr22	35257316	35257531	+	36.7833	-29	NR_027780	10042	Hs.588815	NM_005487	ENSG00000100281	HMGXB4	HMG2L1|HMGBCG|THC211630	HMG-box containing 4	protein-coding
chr3	119323168	119323407	+	36.5667	-527	NR_046748	100874246	Hs.607097	NR_046748	ENSG00000241155	ARHGAP31-AS1	-	ARHGAP31 antisense RNA 1	ncRNA
chr17	7351705	7351929	+	35.4667	-72	NM_001002914	147040	Hs.592112	NM_001002914	ENSG00000213859	KCTD11	C17orf36|KCASH1|REN|REN/KCTD11	potassium channel tetramerization domain containing 11	protein-coding
chr3	101849225	101849464	+	34.85	-170	NM_031419	64332	Hs.319171	NM_031419	ENSG00000144802	NFKBIZ	IKBZ|INAP|MAIL	NFKB inhibitor zeta	protein-coding
chr3	101827650	101827865	+	34.1	-233	NM_001005474	64332	Hs.319171	NM_031419	ENSG00000144802	NFKBIZ	IKBZ|INAP|MAIL	NFKB inhibitor zeta	protein-coding
chr17	7687417	7687631	+	33.8	26	NM_001126112	7157	Hs.437460	NM_000546	ENSG00000141510	TP53	BCC7|LFS1|P53|TRP53	tumor protein p53	protein-coding
chr7	135170688	135170902	+	33.75	31	NM_001243749	78996	Hs.643113	NM_024033	ENSG00000122783	CYREN	C7orf49|MRI|MRI-2	cell cycle regulator of NHEJ	protein-coding
chr17	39864101	39864315	+	29.4333	-20	NM_012481	22806	Hs.371680	NM_012481	ENSG00000161405	IKZF3	AIO|AIOLOS|ZNFN1A3	IKAROS family zinc finger 3	protein-coding
chr9	93134541	93134750	+	29.35	-357	NM_004148	4814	Hs.494457	NM_004148	ENSG00000131669	NINJ1	NIN1|NINJURIN	ninjurin 1	protein-coding
chr19	45001225	45001445	+	27.8167	-114	NM_006509	5971	Hs.654402	NM_006509	ENSG00000104856	RELB	I-REL|IMD53|IREL|REL-B	RELB proto-oncogene, NF-kB subunit	protein-coding
chr16	50741890	50742100	+	27.1333	-55	NM_001042355	1540	Hs.578973	NM_015247	ENSG00000083799	CYLD	BRSS|CDMT|CYLD1|CYLDI|EAC|MFT|MFT1|SBS|TEM|USPL2	CYLD lysine 63 deubiquitinase	protein-coding
chr2	207529485	207529735	+	27.05	-282	NM_134442	1385	Hs.516646	NM_004379	ENSG00000118260	CREB1	CREB|CREB-1	cAMP responsive element binding protein 1	protein-coding
chr19	44748597	44748809	+	26.7167	-18	NM_005178	602	Hs.31210	NM_005178	ENSG00000069399	BCL3	BCL4|D19S37	B cell CLL/lymphoma 3	protein-coding
chr16	3065227	3065427	+	25.7833	15	NM_001012633	9235	Hs.943	NM_004221	ENSG00000008517	IL32	IL-32alpha|IL-32beta|IL-32delta|IL-32gamma|NK4|TAIF|TAIFa|TAIFb|TAIFc|TAIFd	interleukin 32	protein-coding
chr20	49812528	49812743	+	25.2333	-78	NR_048538	23315	Hs.444202	NM_015266	ENSG00000197818	SLC9A8	NHE-8|NHE8	solute carrier family 9 member A8	protein-coding
chr14	35404703	35404921	+	24.8333	-58	NM_020529	4792	Hs.81328	NM_020529	ENSG00000100906	NFKBIA	IKBA|MAD-3|NFKBI	NFKB inhibitor alpha	protein-coding
chr13	43879479	43879687	+	24.45	12	NM_001350617	160857	Hs.170849	NM_144974	ENSG00000151773	CCDC122	-	coiled-coil domain containing 122	protein-coding
chr10	13099967	13100173	+	24.4167	-12	NM_001008212	10133	Hs.332706	NM_021980	ENSG00000123240	OPTN	ALS12|FIP2|GLC1E|HIP7|HYPL|NRP|TFIIIA-INTP	optineurin	protein-coding
chr6	14117626	14117842	+	24.2667	100	NM_004233	9308	Hs.595133	NM_004233	ENSG00000112149	CD83	BL11|HB15	CD83 molecule	protein-coding
chr15	50765643	50765865	+	23.85	-41	NM_032802	84888	Hs.401537	NM_032802	ENSG00000138600	SPPL2A	IMP3|PSL2	signal peptide peptidase like 2A	protein-coding
chr2	135985626	135985844	+	23.6667	-51	NM_001293312	1615	Hs.503787	NM_001349	ENSG00000115866	DARS	HBSL|aspRS	aspartyl-tRNA synthetase	protein-coding
chr2	227813653	227813868	+	23.3083	-82	NM_004591	6364	Hs.75498	NM_004591	ENSG00000115009	CCL20	CKb4|Exodus|LARC|MIP-3-alpha|MIP-3a|MIP3A|SCYA20|ST38	C-C motif chemokine ligand 20	protein-coding
chr19	48646498	48646698	+	23.2333	-286	NM_001217	770	Hs.428446	NM_001217	ENSG00000063180	CA11	CA-RP|CA-RP II|CA-XI|CARP-2|CARPX1	carbonic anhydrase 11	protein-coding
chr19	47231280	47231498	+	22.9967	-195	NM_014417	27113	Hs.467020	NM_014417	ENSG00000105327	BBC3	JFY-1|JFY1|PUMA	BCL2 binding component 3	protein-coding
chr11	94128648	94128851	+	22.8667	-179	NM_015368	24145	Hs.591976	NM_015368	ENSG00000110218	PANX1	MRS1|PX1|UNQ2529	pannexin 1	protein-coding
chr4	73740368	73740569	+	22.695	-38	NM_000584	3576	Hs.624	NM_000584	ENSG00000169429	CXCL8	GCP-1|GCP1|IL8|LECT|LUCT|LYNAP|MDNCF|MONAP|NAF|NAP-1|NAP1	C-X-C motif chemokine ligand 8	protein-coding
chr11	66480648	66480913	+	22.5333	-531	NR_120586	101928069	Hs.523816	NR_120586	ENSG00000255517	LOC101928069	-	uncharacterized LOC101928069	ncRNA
chr11	6390137	6390370	+	22.4133	-161	NM_001007593	6609	Hs.498173	NM_000543	ENSG00000166311	SMPD1	ASM|ASMASE|NPD	sphingomyelin phosphodiesterase 1	protein-coding
chr2	71023675	71023877	+	22.33	-299	NR_002185	79315	Hs.327033	NR_002185	ENSG00000205847	OR7E91P	-	olfactory receptor family 7 subfamily E member 91 pseudogene	pseudo
chr20	63537886	63538100	+	22.1833	-623	NM_001256358	5753	Hs.51133	NM_005975	ENSG00000101213	PTK6	BRK	protein tyrosine kinase 6	protein-coding
chr4	102501194	102501411	+	22.155	-27	NM_003998	4790	Hs.618430	NM_003998	ENSG00000109320	NFKB1	CVID12|EBP-1|KBF1|NF-kB1|NF-kappa-B|NF-kappaB|NFKB-p105|NFKB-p50|NFkappaB|p105|p50	nuclear factor kappa B subunit 1	protein-coding
chr5	57173520	57173728	+	21.9333	-324	NM_001331037	65056	Hs.444279	NM_022913	ENSG00000062194	GPBP1	GPBP|SSH6|VASCULIN	GC-rich promoter binding protein 1	protein-coding
chr5	132490733	132490955	+	21.8833	-71	NM_002198	3659	Hs.436061	NM_002198	ENSG00000125347	IRF1	IRF-1|MAR	interferon regulatory factor 1	protein-coding
chr11	67583415	67583617	+	21.8342	-79	NM_000852	2950	Hs.523836	NM_000852	ENSG00000084207	GSTP1	DFN7|FAEES3|GST3|GSTP|HEL-S-22|PI	glutathione S-transferase pi 1	protein-coding
chr10	30433903	30434119	+	21.8167	-10	NM_001244134	1326	Hs.432453	NM_005204	ENSG00000107968	MAP3K8	AURA2|COT|EST|ESTF|MEKK8|TPL2|Tpl-2|c-COT	mitogen-activated protein kinase kinase kinase 8	protein-coding
chr15	52019001	52019204	+	21.6667	-112	NM_002748	5597	Hs.411847	NM_002748	ENSG00000069956	MAPK6	ERK3|HsT17250|PRKM6|p97MAPK	mitogen-activated protein kinase 6	protein-coding
chr2	60881431	60881663	+	21.5333	52	NM_001291746	5966	Hs.631886	NM_002908	ENSG00000162924	REL	C-Rel	REL proto-oncogene, NF-kB subunit	protein-coding
chr18	268047	268281	+	21.4167	-105	NM_005131	9984	Hs.712543	NM_005131	ENSG00000079134	THOC1	HPR1|P84|P84N5	THO complex 1	protein-coding
chr11	73142321	73142561	+	21.2833	-343	NM_014824	9873	Hs.744959	NM_014824	ENSG00000137478	FCHSD2	NWK|SH3MD3	FCH and double SH3 domains 2	protein-coding
chr18	9101866	9102067	+	21.1667	-664	NM_021074	4729	Hs.464572	NM_021074	ENSG00000178127	NDUFV2	CI-24k	NADH:ubiquinone oxidoreductase core subunit V2	protein-coding
chr9	35657822	35658051	+	20.6167	82	NR_003051	6023	Hs.587502	NR_003051	ENSG00000269900	RMRP	CHH|NME1|RMRPR|RRP2	RNA component of mitochondrial RNA processing endoribonuclease	ncRNA
chr2	68467422	68467624	+	20.4333	-36	NM_173545	200558	Hs.720369	NM_173545	ENSG00000169621	APLF	APFL|C2orf13|PALF|Xip1|ZCCHH1	aprataxin and PNKP like factor	protein-coding
chr11	65614293	65614500	+	20.05	-147	NM_002419	4296	Hs.502872	NM_002419	ENSG00000173327	MAP3K11	MEKK11|MLK-3|MLK3|PTK1|SPRK	mitogen-activated protein kinase kinase kinase 11	protein-coding
chr15	64387700	64387917	+	19.6	-2	NM_001321924	9325	Hs.500340	NM_016213	ENSG00000103671	TRIP4	ASC-1|ASC1|HsT17391|MDCDC|SMABF1|ZC2HC5	thyroid hormone receptor interactor 4	protein-coding
chr10	102395555	102395777	+	19.2033	70	NM_001261403	4791	Hs.73090	NM_002502	ENSG00000077150	NFKB2	CVID10|H2TF1|LYT-10|LYT10|NF-kB2|p100|p49/p100|p52	nuclear factor kappa B subunit 2	protein-coding
chr6	131063238	131063461	+	19	-27	NM_001350314	2037	Hs.486470	NM_001431	ENSG00000079819	EPB41L2	4.1-G|4.1G	erythrocyte membrane protein band 4.1 like 2	protein-coding
chr19	49897777	49897980	+	18.9167	-988	NM_152899	259307	Hs.574492	NM_152899	ENSG00000104951	IL4I1	FIG1|LAAO|LAO	interleukin 4 induced 1	protein-coding
chr4	74099143	74099351	+	18.7633	33	NM_002089	2920	Hs.75765	NM_002089	ENSG00000081041	CXCL2	CINC-2a|GRO2|GROb|MGSA-b|MIP-2a|MIP2|MIP2A|SCYB2	C-X-C motif chemokine ligand 2	protein-coding
chr4	73869206	73869449	+	18.6933	-65	NM_001511	2919	Hs.789	NM_001511	ENSG00000163739	CXCL1	FSP|GRO1|GROa|MGSA|MGSA-a|NAP-3|SCYB1	C-X-C motif chemokine ligand 1	protein-coding
chr11	442050	442294	+	18.65	-161	NM_001347882	338440	Hs.501622	NM_001012302	ENSG00000185101	ANO9	PIG5|TMEM16J|TP53I5	anoctamin 9	protein-coding
chr11	96343344	96343585	+	18.6367	-284	NM_032427	84441	Hs.428214	NM_032427	ENSG00000184384	MAML2	MAM-3|MAM2|MAM3|MLL-MAML2	mastermind like transcriptional coactivator 2	protein-coding
chr4	74038619	74038843	+	18.505	42	NM_002090	2921	Hs.89690	NM_002090	ENSG00000163734	CXCL3	CINC-2b|GRO3|GROg|MIP-2b|MIP2B|SCYB3	C-X-C motif chemokine ligand 3	protein-coding
chr7	111562352	111562555	+	18.4617	64	NM_001350959	83943	Hs.655722	NM_032549	ENSG00000184903	IMMP2L	IMMP2L-IT1|IMP2|IMP2-LIKE	inner mitochondrial membrane peptidase subunit 2	protein-coding
chr3	157160727	157160956	+	18.3533	-81	NM_020307	57018	Hs.4859	NM_020307	ENSG00000163660	CCNL1	ANIA6A|BM-001|PRO1073|ania-6a	cyclin L1	protein-coding
chr17	21287873	21288074	+	18.2283	-63	NM_002756	5606	Hs.514012	NM_002756	ENSG00000034152	MAP2K3	MAPKK3|MEK3|MKK3|PRKMK3|SAPKK-2|SAPKK2	mitogen-activated protein kinase kinase 3	protein-coding
chr2	190648770	190649016	+	18.1833	-2	NM_001321313	4664	Hs.107474	NM_005966	ENSG00000138386	NAB1	-	NGFI-A binding protein 1	protein-coding
chr6	44265591	44265797	+	18.0333	94	NM_004556	4794	Hs.458276	NM_004556	ENSG00000146232	NFKBIE	IKBE	NFKB inhibitor epsilon	protein-coding
chr11	65873655	65873899	+	17.9667	-843	NM_016938	30008	Hs.731454	NM_016938	ENSG00000172638	EFEMP2	ARCL1B|FBLN4|MBP1|UPH1	EGF containing fibulin extracellular matrix protein 2	protein-coding
chr19	47227562	47227842	+	17.8667	-683	NR_036159	100422832		NR_036159	ENSG00000284411	MIR3191	mir-3191	microRNA 3191	ncRNA
chr20	833646	833873	+	17.6667	62	NM_001042353	83541	Hs.574822	NM_031424	ENSG00000125898	FAM110A	C20orf55|F10|bA371L19.3	family with sequence similarity 110 member A	protein-coding
chr16	67872820	67873063	+	17.6	-82	NM_014329	23644	Hs.75682	NM_014329	ENSG00000038358	EDC4	GE1|Ge-1|HEDL5|HEDLS|RCD-8|RCD8	enhancer of mRNA decapping 4	protein-coding
chr19	4831714	4831974	+	17.4667	-102	NM_182919	148022	Hs.29344	NM_014261	ENSG00000127666	TICAM1	IIAE6|MyD88-3|PRVTIRB|TICAM-1|TRIF	toll like receptor adaptor molecule 1	protein-coding
chr16	57284768	57284973	+	17.3717	-198	NM_015993	51090	Hs.632215	NM_015993	ENSG00000102934	PLLP	PMLP|TM4SF11	plasmolipin	protein-coding
chr12	42238230	42238447	+	17.3667	30	NM_001320080	10138	Hs.649195	NM_005748	ENSG00000015153	YAF2	-	YY1 associated factor 2	protein-coding
chr17	7014359	7014669	+	17.0117	-223	NM_001142798	124944	Hs.511801	NM_174893	ENSG00000258315	C17orf49	BAP18|HEPIS	chromosome 17 open reading frame 49	protein-coding
chr16	81778982	81779186	+	16.87	-174	NM_002661	5336	Hs.372303	NM_002661	ENSG00000197943	PLCG2	APLAID|FCAS3|PLC-IV|PLC-gamma-2	phospholipase C gamma 2	protein-coding
chr19	48872149	48872374	+	16.7917	-131	NM_014330	23645	Hs.631593	NM_014330	ENSG00000087074	PPP1R15A	GADD34	protein phosphatase 1 regulatory subunit 15A	protein-coding
chr14	64503956	64504167	+	16.75	-216	NM_006977	7597	Hs.654571	NM_006977	ENSG00000089775	ZBTB25	C14orf51|KUP|ZNF46	zinc finger and BTB domain containing 25	protein-coding
chr19	49640206	49640416	+	16.5383	-168	NM_006270	6237	Hs.515536	NM_006270	ENSG00000126458	RRAS	R-Ras	RAS related	protein-coding
chr12	101877146	101877364	+	16.52	-72	NM_018370	55332	Hs.525634	NM_018370	ENSG00000136048	DRAM1	DRAM	DNA damage regulated autophagy modulator 1	protein-coding
chr5	134506248	134506460	+	16.45	-198	NR_105045	101927934	Hs.535775	NR_105045	ENSG00000251169	LINC01843	-	long intergenic non-protein coding RNA 1843	ncRNA
chr12	112938244	112938472	+	16.4067	-75	NM_006187	4940	Hs.528634	NM_006187	ENSG00000111331	OAS3	p100|p100OAS	2'-5'-oligoadenylate synthetase 3	protein-coding
chr1	211259074	211259310	+	16.35	-85	NM_001136224	55758	Hs.356399	NM_018254	ENSG00000117625	RCOR3	-	REST corepressor 3	protein-coding
chr11	110092637	110092864	+	16.2	-611	NM_033390	85463	Hs.376289	NM_033390	ENSG00000149289	ZC3H12C	MCPIP3	zinc finger CCCH-type containing 12C	protein-coding
chr7	18509065	18509275	+	16.1833	-103	NM_001204147	9734	Hs.196054	NM_014707	ENSG00000048052	HDAC9	HD7|HD7b|HD9|HDAC|HDAC7|HDAC7B|HDAC9B|HDAC9FL|HDRP|MITR	histone deacetylase 9	protein-coding
chr17	35063634	35063856	+	15.97	-5	NM_001017368	117584	Hs.13680	NM_057178	ENSG00000092871	RFFL	CARP-2|CARP2|FRING|RIFIFYLIN|RNF189|RNF34L	ring finger and FYVE like domain containing E3 ubiquitin protein ligase	protein-coding
chr7	32892129	32892372	+	15.9167	-394	NM_015483	25948	Hs.372541	NM_015483	ENSG00000170852	KBTBD2	BKLHD1	kelch repeat and BTB domain containing 2	protein-coding
chr20	62666889	62667104	+	15.775	-375	NR_024470	100127888	Hs.671273	NR_024470	ENSG00000232803	SLCO4A1-AS1	-	SLCO4A1 antisense RNA 1	ncRNA
chr12	76031586	76031802	+	15.7433	82	NM_007350	22822	Hs.602085	NM_007350	ENSG00000139289	PHLDA1	DT1P1B11|PHRIP|TDAG51	pleckstrin homology like domain family A member 1	protein-coding
chr16	71894990	71895202	+	15.675	-397	NM_001270979	9798	Hs.232194	NM_014761	ENSG00000182149	IST1	OLC1	IST1, ESCRT-III associated factor	protein-coding
chr7	107743572	107743780	+	15.6217	-21	NM_001284291	79872	Hs.592271	NM_024814	ENSG00000105879	CBLL1	HAKAI|RNF188	Cbl proto-oncogene like 1	protein-coding
chr12	56300321	56300538	+	15.5833	-38	NM_004077	1431	Hs.743252	NM_004077	ENSG00000062485	CS	-	citrate synthase	protein-coding
chr5	173144284	173144505	+	15.5167	-48	NM_001205	662	Hs.145726	NM_001205	ENSG00000113734	BNIP1	NIP1|SEC20|TRG-8	BCL2 interacting protein 1	protein-coding
chr5	10563706	10563939	+	15.1117	-501	NM_001164440	651746	Hs.26039	NM_001164440	ENSG00000164236	ANKRD33B	-	ankyrin repeat domain 33B	protein-coding
chr12	126772500	126772729	+	15.075	-352	NR_033878	387895	Hs.534660	NR_033878		LINC00944	-	long intergenic non-protein coding RNA 944	ncRNA
chr13	27171975	27172187	+	14.9517	-178	NR_046548	100874071	Hs.735400	NR_046548		USP12-AS2	-	USP12 antisense RNA 2 (head to head)	ncRNA
chr2	191014192	191014393	+	14.9042	-42	NM_139266	6772	Hs.642990	NM_007315	ENSG00000115415	STAT1	CANDF7|IMD31A|IMD31B|IMD31C|ISGF-3|STAT91	signal transducer and activator of transcription 1	protein-coding
chr16	18926545	18926779	+	14.8633	-258	NM_015092	23049	Hs.460179	NM_015092	ENSG00000157106	SMG1	61E3.4|ATX|LIP	SMG1, nonsense mediated mRNA decay associated PI3K related kinase	protein-coding
chr11	64803258	64803480	+	14.8	-115	NM_001307990	5871	Hs.534341	NM_004579	ENSG00000168067	MAP4K2	BL44|GCK|RAB8IP	mitogen-activated protein kinase kinase kinase kinase 2	protein-coding
chr7	155962252	155962452	+	14.665	-280	NM_001291913	389602	Hs.583071	NM_001291913		LOC389602	-	uncharacterized LOC389602	protein-coding
chr18	12884165	12884372	+	14.55	67	NM_080423	5771	Hs.654527	NM_002828	ENSG00000175354	PTPN2	PTN2|PTPT|TC-PTP|TCELLPTP|TCPTP	protein tyrosine phosphatase, non-receptor type 2	protein-coding
chr17	80260276	80260521	+	14.5133	-463	NM_001256071	57674	Hs.195642	NM_020914	ENSG00000173821	RNF213	ALO17|C17orf27|KIAA1618|MYMY2|MYSTR|NET57	ring finger protein 213	protein-coding
chrX	24054484	24054726	+	14.5133	-343	NM_001415	1968	Hs.539684	NM_001415	ENSG00000130741	EIF2S3	EIF2|EIF2G|EIF2gamma|MEHMO|MRXSBRK|eIF-2gA	eukaryotic translation initiation factor 2 subunit gamma	protein-coding
chr10	28532523	28532751	+	14.425	49	NM_100264	51322	Hs.743224	NM_016628	ENSG00000095787	WAC	BM-016|DESSH|PRO1741|Wwp4	WW domain containing adaptor with coiled-coil	protein-coding
chr11	64240855	64241084	+	14.09	28	NM_004470	2286	Hs.227729	NM_004470	ENSG00000173486	FKBP2	FKBP-13|PPIase	FK506 binding protein 2	protein-coding
chr16	29811305	29811540	+	14.0533	-666	NM_145239	112476	Hs.655071	NM_145239	ENSG00000167371	PRRT2	BFIC2|BFIS2|DSPB3|DYT10|EKD1|FICCA|ICCA|IFITMD1|PKC	proline rich transmembrane protein 2	protein-coding
chr1	24744959	24745161	+	14.05	-209	NM_013943	25932	Hs.440544	NM_013943	ENSG00000169504	CLIC4	CLIC4L|H1|MTCLIC|huH1|p64H1	chloride intracellular channel 4	protein-coding
chr6	17705922	17706165	+	14.0442	-87	NR_134616	105374952	Hs.718703	NR_134616	ENSG00000272269	LOC105374952	-	uncharacterized LOC105374952	ncRNA
chr19	3761519	3761735	+	14.0333	48	NM_004886	9546	Hs.25527	NM_004886	ENSG00000011132	APBA3	MGC:15815|X11L2|mint3	amyloid beta precursor protein binding family A member 3	protein-coding
chr1	94541850	94542051	+	14.0167	-93	NM_001993	2152	Hs.62192	NM_001993	ENSG00000117525	F3	CD142|TF|TFA	coagulation factor III, tissue factor	protein-coding
chr1	227563448	227563682	+	13.9117	46	NR_033184	339500	Hs.30323	NM_032755	ENSG00000181450	ZNF678	-	zinc finger protein 678	protein-coding
chr5	95961127	95961366	+	13.8567	-755	NR_130776	101929710		NR_130776	ENSG00000251314	LOC101929710	-	uncharacterized LOC101929710	ncRNA
chr1	37479851	37480127	+	13.85	-241	NR_106790	102465438		NR_106790	ENSG00000283724	MIR6732	hsa-mir-6732	microRNA 6732	ncRNA
chr14	73760344	73760563	+	13.8317	-155	NM_194278	91748	Hs.594157	NM_194278	ENSG00000156030	ELMSAN1	C14orf117|C14orf43|LSR68|MIDEAS|c14_5541	ELM2 and Myb/SANT domain containing 1	protein-coding
chr19	53867606	53867884	+	13.7975	-120	NM_001290191	91663	Hs.380906	NM_138373	ENSG00000179820	MYADM	SB135	myeloid associated differentiation marker	protein-coding
chr2	207625412	207625619	+	13.46	-137	NM_001127395	151194	Hs.664764	NM_145280	ENSG00000144401	METTL21A	FAM119A|HCA557b|HSPA-KMT	methyltransferase like 21A	protein-coding
chr4	73069712	73069933	+	13.44	-63	NM_001297733	285521	Hs.356697	NM_173827	ENSG00000163626	COX18	COX18HS	COX18, cytochrome c oxidase assembly factor	protein-coding
chr3	52197875	52198088	+	13.3733	-102	NM_001304444	211	Hs.476308	NM_000688	ENSG00000023330	ALAS1	ALAS|ALAS-H|ALAS3|ALASH|MIG4	5'-aminolevulinate synthase 1	protein-coding
chr6	142945209	142945427	+	13.2867	-117	NM_006734	3097	Hs.510172	NM_006734	ENSG00000010818	HIVEP2	HIV-EP2|MBP-2|MIBP1|MRD43|SHN2|ZAS2|ZNF40B	human immunodeficiency virus type I enhancer binding protein 2	protein-coding
chr2	182715850	182716095	+	13.1933	-69	NR_073365	54431	Hs.516632	NM_018981	ENSG00000077232	DNAJC10	ERdj5|JPDI|MTHr|PDIA19	DnaJ heat shock protein family (Hsp40) member C10	protein-coding
chr2	84459347	84459561	+	13.1008	8	NM_003849	8802	Hs.270428	NM_003849	ENSG00000163541	SUCLG1	GALPHA|MTDPS9|SUCLA1	succinate-CoA ligase alpha subunit	protein-coding
chr12	52050953	52051158	+	13.045	-347	NM_173157	3164	Hs.524430	NM_002135	ENSG00000123358	NR4A1	GFRP1|HMR|N10|NAK-1|NGFIB|NP10|NUR77|TR3	nuclear receptor subfamily 4 group A member 1	protein-coding
chrX	132218127	132218367	+	12.9733	-86	NM_021183	57826	Hs.119889	NM_021183	ENSG00000123728	RAP2C	-	RAP2C, member of RAS oncogene family	protein-coding
chr6	44127218	44127423	+	12.96	-13	NM_001318768	64928	Hs.311190	NM_032111	ENSG00000180992	MRPL14	L14mt|L32mt|MRP-L14|MRP-L32|MRPL32|RMPL32|RPML32	mitochondrial ribosomal protein L14	protein-coding
chr2	162318792	162318997	+	12.9383	-88	NM_001330267	25801	Hs.377894	NM_012198	ENSG00000115271	GCA	GCL	grancalcin	protein-coding
chr15	51622946	51623254	+	12.9333	-330	NM_001174116	23312	Hs.511386	NM_015263	ENSG00000104093	DMXL2	DFNA71|PEPNS|RC3	Dmx like 2	protein-coding
chrX	49043385	49043623	+	12.8483	13	NM_001282142	7030	Hs.730740	NM_006521	ENSG00000068323	TFE3	RCCP2|RCCX1|TFEA|bHLHe33	transcription factor binding to IGHM enhancer 3	protein-coding
chr15	101295103	101295312	+	12.82	75	NR_135507	6627	Hs.528763	NM_003090	ENSG00000131876	SNRPA1	Lea1|U2A'	small nuclear ribonucleoprotein polypeptide A'	protein-coding
chr6	10838477	10838711	+	12.6217	-39	NR_134935	4117	Hs.446125	NM_005906	ENSG00000111837	MAK	RP62	male germ cell associated kinase	protein-coding
chr4	674468	674674	+	12.5842	-233	NM_007100	521	Hs.85539	NM_007100	ENSG00000169020	ATP5ME	ATP5I|ATP5K	ATP synthase membrane subunit e	protein-coding
chr1	36149713	36149955	+	12.55	-320	NM_014408	27095	Hs.523131	NM_014408	ENSG00000054116	TRAPPC3	BET3	trafficking protein particle complex 3	protein-coding
chr19	39125651	39125951	+	12.5175	21	NM_001014832	10298	Hs.20447	NM_005884	ENSG00000130669	PAK4	-	p21 (RAC1) activated kinase 4	protein-coding
chr2	74441795	74442035	+	12.5083	18	NM_001015055	6242	Hs.192854	NM_033046	ENSG00000114993	RTKN	-	rhotekin	protein-coding
chr22	49962413	49962636	+	12.3883	-342	NR_106879	102465493		NR_106879	ENSG00000276753	MIR6821	hsa-mir-6821	microRNA 6821	ncRNA
chr3	101676275	101676476	+	12.385	-55	NR_024407	100009676	Hs.743292	NR_024407	ENSG00000256628	ZBTB11-AS1	-	ZBTB11 antisense RNA 1	ncRNA
chr2	171894365	171894588	+	12.2667	-170	NR_047549	8604	Hs.470608	NM_003705	ENSG00000115840	SLC25A12	AGC1|ARALAR|EIEE39	solute carrier family 25 member 12	protein-coding
chr11	43920744	43920968	+	12.2375	88	NR_038907	100507300	Hs.664588	NR_038907	ENSG00000244926	ALKBH3-AS1	-	ALKBH3 antisense RNA 1	ncRNA
chr14	102777392	102777597	+	12.2133	15	NM_003300	7187	Hs.510528	NM_003300	ENSG00000131323	TRAF3	CAP-1|CAP1|CD40bp|CRAF1|IIAE5|LAP1|RNF118	TNF receptor associated factor 3	protein-coding
chr6	43477440	43477673	+	12.205	33	NM_001350570	93643	Hs.520145	NM_080604	ENSG00000137221	TJAP1	PILT|TJP4	tight junction associated protein 1	protein-coding
chr1	31576178	31576404	+	12.1908	-194	NM_001204414	64129	Hs.199368	NM_022164	ENSG00000142910	TINAGL1	ARG1|LCN7|LIECG3|TINAGRP	tubulointerstitial nephritis antigen like 1	protein-coding
chr15	55290261	55290501	+	12.0717	-566	NM_183235	5873	Hs.654978	NM_004580	ENSG00000069974	RAB27A	GS2|HsT18676|RAB27|RAM	RAB27A, member RAS oncogene family	protein-coding
chr1	31938609	31938835	+	12.01	-335	NM_080391	8073	Hs.470477	NM_003479	ENSG00000184007	PTP4A2	HH13|HH7-2|HU-PP-1|OV-1|PRL-2|PRL2|PTP4A|PTPCAAX2|ptp-IV1a|ptp-IV1b	protein tyrosine phosphatase type IVA, member 2	protein-coding
chr18	5296851	5297059	+	11.99	98	NM_001243704	7541	Hs.592340	NM_003409	ENSG00000198081	ZBTB14	ZF5|ZFP-161|ZFP-5|ZFP161|ZNF478	zinc finger and BTB domain containing 14	protein-coding
chr6	144150106	144150364	+	11.97	-282	NM_003764	8676	Hs.118958	NM_003764	ENSG00000135604	STX11	FHL4|HLH4|HPLH4	syntaxin 11	protein-coding
chr7	19708994	19709246	+	11.9633	-83	NM_001002926	221830	Hs.353035	NM_001002926	ENSG00000105849	TWISTNB	-	TWIST neighbor	protein-coding
chr2	101697190	101697412	+	11.9617	-402	NM_004834	9448	Hs.701013	NM_004834	ENSG00000071054	MAP4K4	FLH21957|HEL-S-31|HGK|MEKKK4|NIK	mitogen-activated protein kinase kinase kinase kinase 4	protein-coding
chr2	210171376	210171580	+	11.9283	-108	NM_001307976	151050	Hs.282260	NM_152519	ENSG00000144445	KANSL1L	C2orf67|MSL1v2	KAT8 regulatory NSL complex subunit 1 like	protein-coding
chr12	6943793	6944000	+	11.8767	79	NR_126035	113246	Hs.405913	NM_138425	ENSG00000111678	C12orf57	C10|GRCC10	chromosome 12 open reading frame 57	protein-coding
chr1	206469584	206469807	+	11.86	-548	NM_001193321	9641	Hs.321045	NM_014002	ENSG00000263528	IKBKE	IKK-E|IKK-i|IKKE|IKKI	inhibitor of nuclear factor kappa B kinase subunit epsilon	protein-coding
chr2	96505386	96505622	+	11.8433	-119	NM_001285485	93082	Hs.149219	NM_001080535	ENSG00000163121	NEURL3	LINCR|RNF132	neuralized E3 ubiquitin protein ligase 3	protein-coding
chr1	203305423	203305652	+	11.8183	1	NM_006763	7832	Hs.519162	NM_006763	ENSG00000159388	BTG2	APRO1|PC3|TIS21	BTG anti-proliferation factor 2	protein-coding
chr16	74998481	74998713	+	11.7717	-420	NM_032268	84937	Hs.427284	NM_032268	ENSG00000186187	ZNRF1	NIN283	zinc and ring finger 1	protein-coding
chr2	197435116	197435359	+	11.7217	-144	NM_001308824	23451	Hs.632554	NM_012433	ENSG00000115524	SF3B1	Hsh155|MDS|PRP10|PRPF10|SAP155|SF3b155	splicing factor 3b subunit 1	protein-coding
chr16	48385887	48386090	+	11.6725	-670	NM_003031	6477	Hs.706828	NM_003031	ENSG00000196470	SIAH1	SIAH1A	siah E3 ubiquitin protein ligase 1	protein-coding
chr5	132777191	132777401	+	11.5192	79	NM_001098812	23176	Hs.522057	NM_015146	ENSG00000164402	2020-09-08	2020-09-02	septin 8	protein-coding
chr19	10270780	10271024	+	11.47	61	NM_000201	3383	Hs.643447	NM_000201	ENSG00000090339	ICAM1	BB2|CD54|P3.58	intercellular adhesion molecule 1	protein-coding
chr17	3558668	3558901	+	11.4617	-789	NM_001258205	162514	Hs.446255	NM_145068	ENSG00000167723	TRPV3	FNEPPK2|OLMS|VRL3	transient receptor potential cation channel subfamily V member 3	protein-coding
chr12	56333787	56334006	+	11.4375	-147	NM_001127460	9924	Hs.273397	NM_014871	ENSG00000135473	PAN2	USP52	poly(A) specific ribonuclease subunit PAN2	protein-coding
chr4	139015742	139015943	+	11.4067	83	NM_012118	25819	Hs.639842	NM_012118	ENSG00000151014	NOCT	CCR4L|CCRN4L|Ccr4c|NOC	nocturnin	protein-coding
chr7	75739343	75739625	+	11.2625	-512	NM_001243198	3092	Hs.329266	NM_005338	ENSG00000127946	HIP1	HIP-I|ILWEQ|SHON|SHONbeta|SHONgamma	huntingtin interacting protein 1	protein-coding
chr7	150367904	150368164	+	11.23	-756	NM_001099696	29803	Hs.647086	NM_013400	ENSG00000214022	REPIN1	AP4|RIP60|ZNF464|Zfp464	replication initiator 1	protein-coding
chr8	101206164	101206406	+	11.0667	-221	NM_001267709	51123	Hs.374485	NM_016096	ENSG00000120963	ZNF706	HSPC038|PNAS-106|PNAS-113	zinc finger protein 706	protein-coding
chr7	100082616	100082830	+	10.9967	-175	NM_001278287	7551	Hs.435302	NM_017715	ENSG00000166526	ZNF3	A8-51|HF.12|KOX25|PP838|Zfp113	zinc finger protein 3	protein-coding
chr5	151087102	151087351	+	10.9883	-40	NM_001252392	10318	Hs.355141	NM_006058	ENSG00000145901	TNIP1	ABIN-1|NAF1|VAN|nip40-1	TNFAIP3 interacting protein 1	protein-coding
chr1	59146940	59147178	+	10.9633	-252	NR_027120	729467	Hs.662291	NR_027120	ENSG00000224609	HSD52	-	uncharacterized LOC729467	ncRNA
chr3	52685390	52685610	+	10.9517	59	NM_001350074	55193	Hs.189920	NM_018165	ENSG00000163939	PBRM1	BAF180|PB1	polybromo 1	protein-coding
chr15	85380216	85380437	+	10.945	-270	NR_106993	102465803		NR_106993	ENSG00000284160	MIR7706	hsa-mir-7706	microRNA 7706	ncRNA
chr9	137302511	137302715	+	10.8975	-362	NM_001004354	441478	Hs.535075	NM_001004354	ENSG00000198435	NRARP	-	NOTCH regulated ankyrin repeat protein	protein-coding
chr1	150234566	150234786	+	10.8933	2	NM_001136479	81611	Hs.656466	NM_030920	ENSG00000143401	ANP32E	LANP-L|LANPL	acidic nuclear phosphoprotein 32 family member E	protein-coding
chrX	64206278	64206499	+	10.7925	-644	NM_152424	139285	Hs.314225	NM_152424	ENSG00000184675	AMER1	FAM123B|OSCS|WTX	APC membrane recruitment protein 1	protein-coding
chr8	102655823	102656102	+	10.76	-60	NM_005655	7071	Hs.435001	NM_005655	ENSG00000155090	KLF10	EGR-alpha|EGRA|TIEG|TIEG1	Kruppel like factor 10	protein-coding
chr18	26226308	26226515	+	10.7583	-472	NM_005640	6875	Hs.369519	NM_005640	ENSG00000141384	TAF4B	SPGF13|TAF2C2|TAFII105	TATA-box binding protein associated factor 4b	protein-coding
chr17	68259120	68259329	+	10.73	42	NM_001352903	22901	Hs.437249	NM_014960	ENSG00000141337	ARSG	-	arylsulfatase G	protein-coding
chr6	96897794	96897996	+	10.6683	-4	NM_014165	29078	Hs.512144	NM_014165	ENSG00000123545	NDUFAF4	C6orf66|HRPAP20|HSPC125|My013|bA22L21.1	NADH:ubiquinone oxidoreductase complex assembly factor 4	protein-coding
chr19	58555018	58555263	+	10.5117	-16	NM_014453	27243	Hs.12107	NM_014453	ENSG00000130724	CHMP2A	BC-2|BC2|CHMP2|VPS2|VPS2A	charged multivesicular body protein 2A	protein-coding
chr9	136483881	136484107	+	10.4308	-235	NM_001276418	9919	Hs.522500	NM_014866	ENSG00000148396	SEC16A	KIAA0310|SEC16L|p250	SEC16 homolog A, endoplasmic reticulum export factor	protein-coding
chr7	45111934	45112196	+	10.4125	-318	NM_004749	9238	Hs.231411	NM_004749	ENSG00000136270	TBRG4	CPR2|FASTKD4	transforming growth factor beta regulator 4	protein-coding
chr1	204411793	204412027	+	10.2917	-93	NM_032833	84919	Hs.304376	NM_032833	ENSG00000158615	PPP1R15B	CREP|MSSGM2	protein phosphatase 1 regulatory subunit 15B	protein-coding
chr22	20495809	20496030	+	10.2208	-36	NM_032775	84861	Hs.517419	NM_032775	ENSG00000099910	KLHL22	KELCHL	kelch like family member 22	protein-coding
chr10	21526001	21526233	+	10.2117	-435	NM_207371	387640	Hs.350848	NM_207371	ENSG00000180592	SKIDA1	C10orf140|DLN-1	SKI/DACH domain containing 1	protein-coding
chr19	633456	633723	+	10.1275	-21	NM_005035	5442	Hs.254113	NM_005035	ENSG00000099821	POLRMT	APOLMT|MTRNAP|MTRPOL|h-mtRPOL	RNA polymerase mitochondrial	protein-coding
chr12	48350775	48351040	+	10.0483	-16	NM_152320	121274	Hs.23492	NM_152320	ENSG00000167528	ZNF641	-	zinc finger protein 641	protein-coding
chr4	39044392	39044689	+	9.97833	-291	NM_001007075	51088	Hs.272251	NM_015990	ENSG00000109790	KLHL5	-	kelch like family member 5	protein-coding
chr1	64469939	64470160	+	9.83083	-744	NM_020925	57685	Hs.443891	NM_020925	ENSG00000158966	CACHD1	-	cache domain containing 1	protein-coding
chr11	128522517	128522754	+	9.82417	-234	NM_001330451	2113	Hs.369438	NM_005238	ENSG00000134954	ETS1	ETS-1|EWSR2|c-ets-1|p54	ETS proto-oncogene 1, transcription factor	protein-coding
chr5	55534969	55535180	+	9.77583	4	NM_003711	8611	Hs.696231	NM_003711	ENSG00000067113	PLPP1	LLP1a|LPP1|PAP-2a|PAP2|PPAP2A	phospholipid phosphatase 1	protein-coding
chr9	4662119	4662321	+	9.75167	3	NM_001353487	55064	Hs.179615	NM_017985	ENSG00000106686	SPATA6L	C9orf68|bA6J24.2	spermatogenesis associated 6 like	protein-coding
chr16	23182521	23182754	+	9.72917	-82	NM_001039	6340	Hs.371727	NM_001039	ENSG00000166828	SCNN1G	BESC3|ENaCg|ENaCgamma|PHA1|SCNEG	sodium channel epithelial 1 gamma subunit	protein-coding
chr9	132670907	132671118	+	9.70667	-611	NM_138620	64794	Hs.660767	NM_022779	ENSG00000125485	DDX31	PPP1R25	DEAD-box helicase 31	protein-coding
chr2	113235466	113235718	+	9.70333	65	NR_047570	654433	Hs.656660	NR_015377	ENSG00000189223	PAX8-AS1	-	PAX8 antisense RNA 1	ncRNA
chr4	184474488	184474725	+	9.66667	-34	NM_002199	3660	Hs.654566	NM_002199	ENSG00000168310	IRF2	IRF-2	interferon regulatory factor 2	protein-coding
chr4	102828060	102828297	+	9.6325	2	NM_181889	7323	Hs.518773	NM_003340	ENSG00000109332	UBE2D3	E2(17)KB3|UBC4/5|UBCH5C	ubiquitin conjugating enzyme E2 D3	protein-coding
chrX	9462904	9463160	+	9.63	-263	NM_001139468	6907	Hs.495656	NM_005647	ENSG00000101849	TBL1X	EBI|SMAP55|TBL1	transducin beta like 1 X-linked	protein-coding
chr3	9649195	9649398	+	9.62833	-137	NM_001077525	64419	Hs.475382	NM_022485	ENSG00000163719	MTMR14	C3orf29	myotubularin related protein 14	protein-coding
chr19	10380784	10381085	+	9.59417	-362	NM_003331	7297	Hs.75516	NM_003331	ENSG00000105397	TYK2	IMD35|JTK1	tyrosine kinase 2	protein-coding
chr2	99154678	99154898	+	9.54667	-167	NM_145197	51601	Hs.719172	NM_015929	ENSG00000144182	LIPT1	LIPT1D	lipoyltransferase 1	protein-coding
chr3	172750870	172751096	+	9.4675	31	NM_001349099	1894	Hs.518299	NM_018098	ENSG00000114346	ECT2	ARHGEF31	epithelial cell transforming 2	protein-coding
chr15	73683988	73684269	+	9.41917	-153	NM_001329629	80381	Hs.744915	NM_025240	ENSG00000103855	CD276	4Ig-B7-H3|B7-H3|B7H3|B7RP-2	CD276 molecule	protein-coding
chr5	150600148	150600353	+	9.37333	-830	NM_001166208	11346	Hs.435228	NM_007286	ENSG00000171992	SYNPO	-	synaptopodin	protein-coding
chr3	50298807	50299024	+	9.27	-26	NM_001200018	24142	Hs.129910	NM_012191	ENSG00000243477	NAA80	FUS-2|FUS2|NAT6	N(alpha)-acetyltransferase 80, NatH catalytic subunit	protein-coding
chr8	144428569	144428783	+	9.235	-113	NM_183057	51160	Hs.418175	NM_016208	ENSG00000160948	VPS28	-	VPS28, ESCRT-I subunit	protein-coding
chr16	88638412	88638629	+	9.2275	-73	NM_013278	27189	Hs.278911	NM_013278	ENSG00000124391	IL17C	CX2|IL-17C	interleukin 17C	protein-coding
chr8	143940192	143940433	+	9.12667	-722	NM_201384	5339	Hs.434248	NM_000445	ENSG00000178209	PLEC	EBS1|EBSMD|EBSND|EBSO|EBSOG|EBSPA|HD1|LGMD2Q|PCN|PLEC1|PLEC1b|PLTN	plectin	protein-coding
chr5	55173106	55173343	+	9.0725	-47	NM_001170402	166979	Hs.669184	NM_152623	ENSG00000164287	CDC20B	G6VTS76519	cell division cycle 20B	protein-coding
chr2	96815823	96816032	+	8.9875	-327	NM_199078	26505	Hs.711617	NM_017623	ENSG00000168763	CNNM3	ACDP3	cyclin and CBS domain divalent metal cation transport mediator 3	protein-coding
chr9	32526137	32526359	+	8.70167	76	NM_014314	23586	Hs.190622	NM_014314	ENSG00000107201	DDX58	RIG-I|RIGI|RLR-1|SGMRT2	DExD/H-box helicase 58	protein-coding
chr17	28842673	28842913	+	8.58833	46	NM_001077498	55731	Hs.564533	NM_018182	ENSG00000173065	FAM222B	C17orf63	family with sequence similarity 222 member B	protein-coding
chr4	54228049	54228306	+	8.53917	-912	NM_001347827	5156	Hs.74615	NM_006206	ENSG00000134853	PDGFRA	CD140A|PDGFR-2|PDGFR2	platelet derived growth factor receptor alpha	protein-coding
chr14	45083754	45084078	+	8.52	-183	NM_017922	55015	Hs.274337	NM_017922	ENSG00000185246	PRPF39	-	pre-mRNA processing factor 39	protein-coding
chr22	41380905	41381134	+	8.45917	-910	NM_003216	7008	Hs.181159	NM_003216	ENSG00000167074	TEF	-	TEF, PAR bZIP transcription factor	protein-coding
chr17	48892121	48892323	+	8.435	-564	NM_001002027	516	Hs.80986	NM_005175	ENSG00000159199	ATP5MC1	ATP5A|ATP5G|ATP5G1	ATP synthase membrane subunit c locus 1	protein-coding
chr14	76151851	76152064	+	8.405	72	NM_001322031	55668	Hs.410231	NM_017926	ENSG00000089916	GPATCH2L	C14orf118	G-patch domain containing 2 like	protein-coding
chr11	2929670	2929902	+	8.38667	-366	NM_003311	7262	Hs.154036	NM_003311	ENSG00000181649	PHLDA2	BRW1C|BWR1C|HLDA2|IPL|TSSC3	pleckstrin homology like domain family A member 2	protein-coding
chr9	35732598	35732815	+	8.38167	-216	NR_106912	102466201		NR_106912	ENSG00000273945	MIR6853	hsa-mir-6853	microRNA 6853	ncRNA
chr20	30376880	30377091	+	8.365	-179	NR_003579	284802	Hs.653099	NM_207350		FRG1BP	C20orf80|FRG1B|bA348I14.2	FSHD region gene 1 family member B, pseudogene	pseudo
chr12	113335282	113335511	+	8.35833	-228	NM_001330466	80024	Hs.286194	NM_024959	ENSG00000089060	SLC8B1	NCKX6|NCLX|SLC24A6	solute carrier family 8 member B1	protein-coding
chr12	122226158	122226398	+	8.2925	-164	NR_103497	101593348	Hs.99308	NR_103497		LOC101593348	-	uncharacterized LOC101593348	ncRNA
chr22	38202726	38203024	+	8.15	-145	NM_001161573	23764	Hs.517617	NM_012323	ENSG00000185022	MAFF	U-MAF|hMafF	MAF bZIP transcription factor F	protein-coding
chr5	93621484	93621685	+	8.07	-796	NR_031754	100313887		NR_031754	ENSG00000284336	MIR2277	mir-2277	microRNA 2277	ncRNA
chr10	25062614	25062865	+	7.9375	-460	NM_001270383	219670	Hs.534486	NM_145010	ENSG00000151023	ENKUR	C10orf63|CFAP106	enkurin, TRPC channel interacting protein	protein-coding
chr1	223846240	223846490	+	7.70083	-393	NM_005426	7159	Hs.523968	NM_005426	ENSG00000143514	TP53BP2	53BP2|ASPP2|BBP|P53BP2|PPP1R13A	tumor protein p53 binding protein 2	protein-coding
chr8	80485312	80485515	+	7.6775	-206	NM_001277145	65986	Hs.591868	NM_023929	ENSG00000205189	ZBTB10	RINZF	zinc finger and BTB domain containing 10	protein-coding
chr2	218880079	218880279	+	7.6025	-354	NM_025216	80326	Hs.121540	NM_025216	ENSG00000135925	WNT10A	OODD|SSPS|STHAG4	Wnt family member 10A	protein-coding
chr19	55643438	55643702	+	7.5225	-50	NM_016535	51545	Hs.20768	NM_016535	ENSG00000171425	ZNF581	HSPC189	zinc finger protein 581	protein-coding
chr22	41832983	41833212	+	7.50417	18	NM_004599	6721	Hs.443258	NM_004599	ENSG00000198911	SREBF2	SREBP-2|SREBP2|bHLHd2	sterol regulatory element binding transcription factor 2	protein-coding
chr11	65900498	65900755	+	7.425	-100	NM_005438	8061	Hs.283565	NM_005438	ENSG00000175592	FOSL1	FRA|FRA1|fra-1	FOS like 1, AP-1 transcription factor subunit	protein-coding
chr12	6607289	6607516	+	7.37917	31	NM_001273	1108	Hs.162233	NM_001273	ENSG00000111642	CHD4	CHD-4|Mi-2b|Mi2-BETA|SIHIWES	chromodomain helicase DNA binding protein 4	protein-coding
chr19	6737557	6737774	+	7.11667	-43	NM_001080452	56927	Hs.167641	NM_020171	ENSG00000125734	GPR108	LUSTR2	G protein-coupled receptor 108	protein-coding
chr1	45491281	45491545	+	7.08417	-245	NM_001320800	10420	Hs.591499	NM_007170	ENSG00000070759	TESK2	-	testis associated actin remodelling kinase 2	protein-coding
chrX	136496395	136496609	+	7.07833	-577	NM_001163280	27336	Hs.204475	NM_014500	ENSG00000102241	HTATSF1	TAT-SF1|TATSF1|dJ196E23.2	HIV-1 Tat specific factor 1	protein-coding
chr10	104268799	104268999	+	7.07	26	NM_001191013	119391	Hs.107384	NM_183239	ENSG00000065621	GSTO2	GSTO 2-2|bA127L20.1	glutathione S-transferase omega 2	protein-coding
chr9	100429397	100429610	+	7.05917	-11	NM_001198806	91283	Hs.530272	NM_080655	ENSG00000066697	MSANTD3	C9orf30|L8	Myb/SANT DNA binding domain containing 3	protein-coding
chr3	20186294	20186552	+	6.925	-190	NM_001012410	151648	Hs.105153	NM_138484	ENSG00000129810	SGO1	CAID|NY-BR-85|SGO|SGOL1	shugoshin 1	protein-coding
chr19	2462127	2462332	+	6.82167	-44	NR_134931	101928602	Hs.541407	NR_134931	ENSG00000267201	LINC01775	-	long intergenic non-protein coding RNA 1775	ncRNA
chr15	69160097	69160308	+	6.45	-395	NM_015554	26035	Hs.183006	NM_015554	ENSG00000138604	GLCE	HSEPI	glucuronic acid epimerase	protein-coding
chr2	203535559	203535769	+	6.4225	-328	NM_001329728	65059	Hs.471162	NM_025252	ENSG00000173166	RAPH1	ALS2CR18|ALS2CR9|LPD|PREL-2|PREL2|RMO1|RalGDS/AF-6	Ras association (RalGDS/AF-6) and pleckstrin homology domains 1	protein-coding
chr12	66169954	66170157	+	6.22	17	NM_001282610	51643	Hs.505934	NM_016056	ENSG00000155957	TMBIM4	CGI-119|GAAP|LFG4|S1R|ZPRO	transmembrane BAX inhibitor motif containing 4	protein-coding
chr2	46942219	46942477	+	6.1	-493	NM_001171511	90411	Hs.662152	NM_139279	ENSG00000180398	MCFD2	F5F8D|F5F8D2|LMAN1IP|SDNSF	multiple coagulation factor deficiency 2	protein-coding
chr12	106955468	106955734	+	5.5775	-121	NM_001319666	90488	Hs.257664	NM_152261	ENSG00000151135	TMEM263	C12orf23	transmembrane protein 263	protein-coding
chr1	1890963	1891210	+	5.45	31	NM_001282538	2782	Hs.430425	NM_002074	ENSG00000078369	GNB1	MRD42	G protein subunit beta 1	protein-coding
